# Supplementary material
Source: PubMed Central journal article supplement (PMC2705608)
Supplement: 0903616106_0903616106SI.pdf [file 0903616106_0903616106SI.pdf]

# Supporting Information

Stivers et al. 10.1073/pnas.0903616106

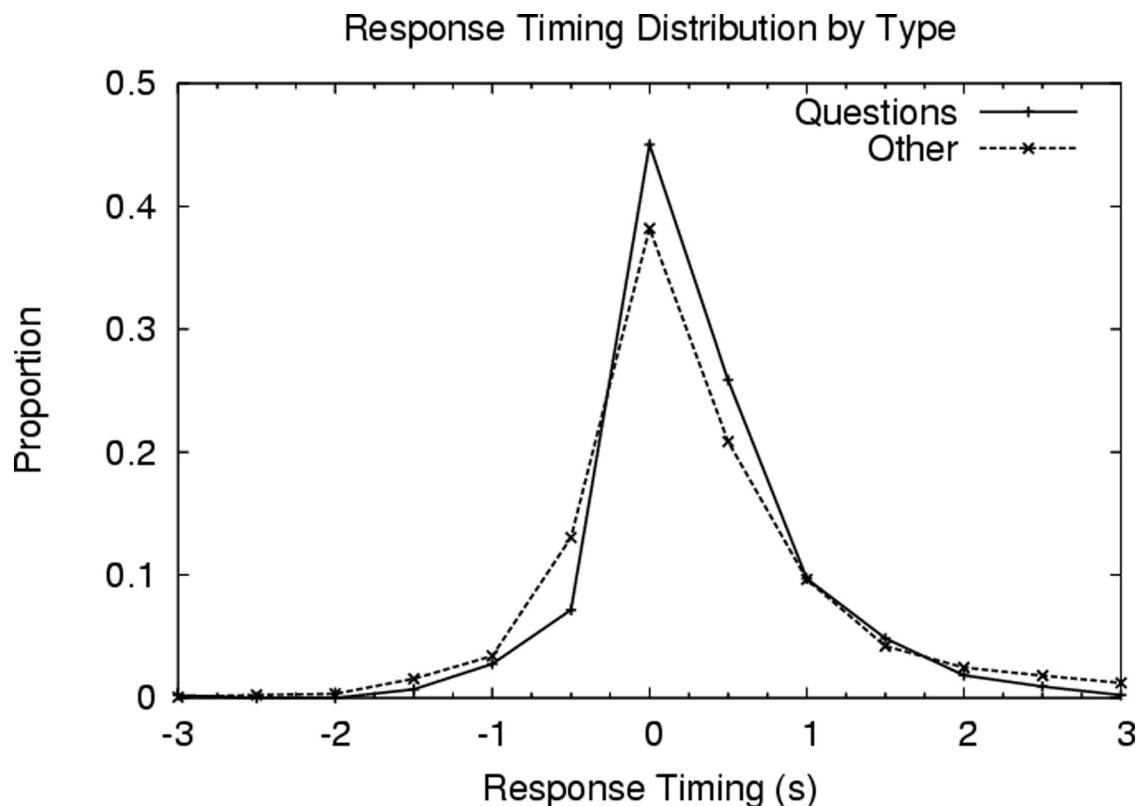

**Fig. S1.** Distribution of next turn offsets comparing question–response sequences with other sorts of turns in dyadic Dutch data. In a corpus of 1,521 turn transitions in continuous Dutch conversation we found no significant difference between the mean and variance of response times after questions and nonquestions [ $t(1519) = -6.57, P = 0.51$ ].

PNAS

| Language                     | Language group | Data collector |
|------------------------------|----------------|----------------|
| ǀĀkhoe Hai  om (Namibia)     | Khoisan        | Hoymann        |
| Danish                       | Germanic       | Heinemann      |
| Dutch                        | Germanic       | Englert        |
| English (United States)      | Germanic       | Stivers        |
| Italian                      | Romance        | Rossano        |
| Japanese                     | Isolate        | Hayashi        |
| Korean                       | Ural-Altaic    | Yoon           |
| Lao                          | Tai            | Enfield        |
| Tzeltal (Mexico)             | Mayan          | Brown          |
| Yéli-Dnye (Papua New Guinea) | Isolate        | Levinson       |

PNAS PNAS PNAS PNAS

**Table S3. Mean, median, mode and standard deviation by language**

| Language       | Mean   | Median | Mode | Standard Deviation |
|----------------|--------|--------|------|--------------------|
| ±Ākhoe Hai  om | 423.16 | 300    | 200  | 661.47             |
| Danish         | 468.88 | 300    | 100  | 607.48             |
| Dutch          | 108.93 | 100    | 100  | 476.45             |
| English        | 236.07 | 0      | 0    | 519.81             |
| Italian        | 309.94 | 200    | 100  | 542.54             |
| Japanese       | 7.29   | 0      | 100  | 503.83             |
| Korean         | 182.56 | 100    | 0    | 506.25             |
| Lao            | 419.63 | 300    | 200  | 488.62             |
| Tzeltal        | 67.13  | 0      | 0    | 452.26             |
| Yéli-Dnye      | 71.26  | 0      | 0    | 371.19             |

Table S4. Overview of data by language

| Language       | Yes/no questions, <i>N</i> | Response given, % | Answer (vs. nonanswer) % of all responses | Confirm (vs. not), % of all answers | With visible (vs. not), % of all answers | With questioner gaze to recipient (vs. not), % of answers | Information request only, % |
|----------------|----------------------------|-------------------|-------------------------------------------|-------------------------------------|------------------------------------------|-----------------------------------------------------------|-----------------------------|
| ±Ākhoe Hai  om | 95                         | 80                | 76                                        | 75                                  | 21                                       | 21                                                        | 42                          |
| Danish         | 196                        | 87                | 75                                        | 71                                  | 37                                       | 75                                                        | 30                          |
| Dutch          | 224                        | 96                | 87                                        | 81                                  | 41                                       | 75                                                        | 16                          |
| English        | 219                        | 95                | 84                                        | 71                                  | 42                                       | 68                                                        | 30                          |
| Italian        | 181                        | 90                | 78                                        | 76                                  | 60                                       | 76                                                        | 32                          |
| Japanese       | 247                        | 89                | 67                                        | 81                                  | 54                                       | 88                                                        | 30                          |
| Korean         | 195                        | 90                | 64                                        | 70                                  | 34                                       | 71                                                        | 21                          |
| Lao            | 163                        | 73                | 82                                        | 77                                  | 27                                       | 63                                                        | 30                          |
| Tzeltal        | 216                        | 93                | 85                                        | 84                                  | 26                                       | 50                                                        | 35                          |
| Yéli-Dnye      | 174                        | 88                | 87                                        | 89                                  | 58                                       | 75                                                        | 48                          |

**Table S5. Results of 2 sample *t* tests graphically represented in Figs. 3 and 4**

| Language       | Difference between answer vs. nonanswer | Difference between confirm vs. disconfirm |
|----------------|-----------------------------------------|-------------------------------------------|
| ±Åkhoe Hai  om | 267.75 ms, $t(93) = 1.71^*$             | 122.22 ms, $t(70) = .77$                  |
| Danish         | 433.33 ms, $t(194) = 4.54^{***}$        | 394.34 ms, $t(145) = 4.35^{***}$          |
| Dutch          | 314.55 ms, $t(222) = 3.4^{***}$         | 127.74 ms, $t(193) = 1.52$                |
| English        | 492.03 ms, $t(217) = 5.53^{***}$        | 323.37 ms, $t(181) = 4.85^{***}$          |
| Italian        | 301.08 ms, $t(179) = 3.14^{***}$        | 304.25 ms, $t(140) = 2.97^{**}$           |
| Japanese       | 264.7 ms, $t(245) = 3.99^{***}$         | 157.28 ms, $t(164) = 1.76^*$              |
| Korean         | 147.54 ms, $t(193) = 1.96^*$            | 116.27 ms, $t(123) = 1.31$                |
| Lao            | 240.38 ms, $t(161) = 2.44^{**}$         | 508.52 ms, $t(132) = 5.70^{***}$          |
| Tzeltal        | 317.39 ms, $t(214) = 3.78^{***}$        | 193.08 ms, $t(182) = 2.34^{**}$           |
| Yéli-Dnye      | 251.44 ms, $t(172) = 3.04^{**}$         | 220.48 ms, $t(150) = 3.23^{***}$          |

Difference in means, degrees of freedom, and *t* values are shown. \*,  $P \leq 0.05$ ; \*\*,  $P \leq 0.01$ ; \*\*\*,  $P \leq 0.001$ .

**Table S6. Results of 2 sample *t* tests graphically represented in Figs. 5 and 6**

| Language       | Difference between with visible vs. without | Difference between with speaker gaze vs. without |
|----------------|---------------------------------------------|--------------------------------------------------|
| ±Åkhoe Hai  om | 430.43, <i>t</i> (75)=2.18*                 | 119.91, <i>t</i> (80)=0.62                       |
| Danish         | 39.36, <i>t</i> (191)=0.43                  | −89.12, <i>t</i> (194)=−0.89                     |
| Dutch          | 291.28, <i>t</i> (204)=4.57***              | 77.45, <i>t</i> (222)=1.06                       |
| English        | 281.88, <i>t</i> (209)=3.97***              | 190.55, <i>t</i> (217)=2.56**                    |
| Italian        | 133.4, <i>t</i> (179)=1.63*                 | 212.67, <i>t</i> (179)=2.27**                    |
| Japanese       | 279.98, <i>t</i> (243)=4.49***              | 90.35, <i>t</i> (245)=0.92                       |
| Korean         | 208.57, <i>t</i> (186)=2.73**               | 157.23, <i>t</i> (193)=1.98*                     |
| Lao            | 290.62, <i>t</i> (142)=3.58***              | 193.92, <i>t</i> (161)=2.49**                    |
| Tzeltal        | 33.7, <i>t</i> (198)=0.42                   | 88.58, <i>t</i> (214)=1.44                       |
| Yéli-Dnye      | 63.54, <i>t</i> (164)=1.07                  | 201.88, <i>t</i> (172)=3.17***                   |

Difference in means, degrees of freedom, and *t* values are shown. \*,  $P \leq 0.05$ ; \*\*,  $P \leq 0.01$ ; \*\*\*,  $P \leq 0.001$ .
